# Supplementary material for: A Metabolomics-Based Screening Proposal for Colorectal Cancer
Source: MDPI journal article supplement (doi:10.3390/metabo12020110), 2022-01-25
Supplement: s1 [file s1]

**Table S1:** Metabolites selected as relevant from the 10 trained classification models and from volcano plot evaluation. Human Metabolites Data Base (HMDB), Kyoto Encyclopedia of Genes and Genomes (KEGG), Chemical Entities of Biological Interest (ChEBI), and PubChem identification numbers were reported as well as the Simplified Molecular Input Line Entry System (SMILES) structures. (NA: Not Available)

| Query                 | HMDB        | PubChem | ChEBI | KEGG   | SMILES                                                                                                                                    |
|-----------------------|-------------|---------|-------|--------|-------------------------------------------------------------------------------------------------------------------------------------------|
| Glucose               | HMDB0000516 | 64689   | 15903 | C00221 | <chem>OC[C@H]1O[C@@H](O)[C@H](O)[C@@H](O)[C@@H]1O</chem>                                                                                  |
| Nicotinic acid        | HMDB0001488 | 938     | 15940 | C00253 | <chem>OC(=O)C1=CN=CC=C1</chem>                                                                                                            |
| Tetra ethylene glycol | NA          | 8200    | 44920 | NA     | <chem>C(COCCOCCOCCO)O</chem>                                                                                                              |
| Quinolinic acid       | HMDB0000232 | 1066    | 16675 | C03722 | <chem>OC(=O)C1=CC=CN=C1C(O)=O</chem>                                                                                                      |
| Myristic acid         | HMDB0000806 | 11005   | 28875 | C06424 | <chem>CCCCCCCCCCCC(=O)O</chem>                                                                                                            |
| Estradiol             | HMDB0000151 | 5757    | 16469 | C00951 | <chem>C[C@]12CC[C@H]3[C@H]([C@@H]1CC[C@@H]2O)CCC4=C3C=CC(=C4)O</chem>                                                                     |
| Lactose               | HMDB0041627 | 6134    | 36218 | C01970 | <chem>[H][C@@]1(O)O[C@]([H])(CO)[C@@]([H])(O[C@]2([H])O[C@]([H])(CO)[C@@]([H])(O)[C@]([H])(O)[C@@]2([H])O)[C@]([H])(O)[C@@]1([H])O</chem> |
| Androstenedione       | HMDB0000053 | 6128    | 16422 | C00280 | <chem>C[C@]12CCC(=O)C=C1CC[C@@H]3[C@@H]2CC[C@]4([C@H]3CCC4=O)C</chem>                                                                     |
| Acetic acid           | HMDB0000042 | 176     | 15366 | C00033 | <chem>CC(=O)O</chem>                                                                                                                      |
| Hydroxylamine         | HMDB0003338 | 787     | 15429 | C00192 | <chem>NO</chem>                                                                                                                           |
| Urea                  | HMDB0000294 | 1176    | 16199 | C00086 | <chem>NC(N)=O</chem>                                                                                                                      |
| Glutamine             | HMDB0000641 | 5961    | 18050 | C00064 | <chem>N[C@@H](CCC(N)=O)C(O)=O</chem>                                                                                                      |
| Oxoglutaric acid      | HMDB0000208 | 51      | 30915 | C00026 | <chem>OC(=O)CCC(=O)C(O)=O</chem>                                                                                                          |
| Oxalic acid           | HMDB0002329 | 971     | 16995 | C00209 | <chem>OC(=O)C(O)=O</chem>                                                                                                                 |
| Tartaric acid         | HMDB0000956 | 444305  | 15671 | C00898 | <chem>O[C@H]([C@@H](O)C(O)=O)C(O)=O</chem>                                                                                                |
| Fructose              | HMDB0000660 | 439709  | 28645 | C02336 | <chem>OC[C@H]1O[C@](O)(CO)[C@H](O)[C@@H]1O</chem>                                                                                         |
| Norepinephrine        | HMDB0000216 | 439260  | 18357 | C00547 | <chem>NC[C@H](O)C1=CC(O)=C(O)C=C1</chem>                                                                                                  |
| Guanine               | HMDB0000132 | 764     | 16235 | C00242 | <chem>NC1=NC(=O)C2=C(N1)N=CN2</chem>                                                                                                      |
| Propionic acid        | HMDB0000237 | 1032    | 30768 | C00163 | <chem>CCC(=O)O</chem>                                                                                                                     |
| Valine                | HMDB0000883 | 6287    | 16414 | C00183 | <chem>CC(C)[C@H](N)C(O)=O</chem>                                                                                                          |
| Pyruvic acid          | HMDB0000243 | 1060    | 32816 | C00022 | <chem>CC(=O)C(=O)O</chem>                                                                                                                 |
| Isoleucine            | HMDB0000557 | 99288   | 43433 | NA     | <chem>CC[C@@H](C)[C@H](N)C(O)=O</chem>                                                                                                    |
| Pyrocatechol          | HMDB0000957 | 289     | 18135 | C15571 | <chem>OC1=CC=CC=C1O</chem>                                                                                                                |
| Oxoproline            | HMDB0000267 | 7405    | 18183 | C01879 | <chem>OC(=O)[C@@H]1CCC(=O)N1</chem>                                                                                                       |
| Threonine             | HMDB0000167 | 6288    | 16857 | C00188 | <chem>C[C@@H](O)[C@H](N)C(O)=O</chem>                                                                                                     |
| Aspartic acid         | HMDB0000191 | 5960    | 17053 | C00049 | <chem>N[C@@H](CC(O)=O)C(O)=O</chem>                                                                                                       |

|                                |             |         |        |        |                                           |
|--------------------------------|-------------|---------|--------|--------|-------------------------------------------|
| <i>Creatinine</i>              | HMDB0000562 | 588     | 16737  | C00791 | CN1CC(=O)NC1=N                            |
| <i>Glutamic acid</i>           | HMDB0000148 | 33032   | 16015  | C00025 | N[C@@H](CCC(O)=O)C(O)=O                   |
| <i>Mandelic acid</i>           | HMDB0000703 | 439616  | 32800  | C01984 | O[C@H](C(O)=O)C1=CC=CC=C1                 |
| <i>Arabinose</i>               | HMDB0000646 | 439195  | 17535  | C00259 | O[C@H]1COC(O)[C@H](O)[C@H]1O              |
| <i>Galactose</i>               | HMDB0000143 | 439357  | 28061  | C00984 | OC[C@H]1O[C@H](O)[C@H](O)[C@@H](O)[C@H]1O |
| <i>Proline</i>                 | HMDB0000162 | 145742  | 17203  | C00148 | OC(=O)[C@@H]1CCCN1                        |
| <i>Oleamide</i>                | HMDB0002117 | 5283387 | 116314 | C19670 | CCCCCCCC/C=C\CCCCCCCC(=O)N                |
| <i>4-Hydroxybenzyl alcohol</i> | HMDB0011724 | 125     | 67410  | C17467 | OCC1=CC=C(O)C=C1                          |
| <i>Palmitic acid</i>           | HMDB0000220 | 985     | 15756  | C00249 | CCCCCCCCCCCCCCCC(=O)O                     |
| <i>Glycerol-glycoside</i>      | NA          | NA      | 24406  | NA     | NA                                        |
| <i>Malonic acid</i>            | HMDB0000691 | 867     | 30794  | C04025 | O=C(O)CC(=O)O                             |
| <i>2-Ketobutyric acid</i>      | HMDB0000005 | 58      | 30831  | C00109 | CCC(=O)C(O)=O                             |
